# Supplementary material for: High-performance optoelectronic memory based on bilayer MoS2 grown by Au catalyst
Source: Royal Society of Chemistry journal article supplement (doi:10.1039/c9tc06996h), 2020-01-01
Supplement: c9tc06996h1.pdf [file c9tc06996h1.pdf]

## Supporting Information

### High-performance Optoelectronic Memory Based on Bilayer MoS<sub>2</sub> grown by Au catalyst

Fengyou Yang<sup>†ab</sup>, Shengyao Chen<sup>†ac</sup>, Huimin Feng<sup>†ab</sup>, Cong Wang<sup>d</sup>, Xiaofeng Wang<sup>ab</sup>, Shu Wang<sup>ab</sup>, Zhican Zhou<sup>ac</sup>, Bo Li<sup>ab</sup>, Lijun Ma<sup>a</sup>, Haiguang Yang<sup>ab</sup>, Yong Xie<sup>e</sup>, Qian Liu<sup>\*abc</sup>

*a. CAS Key Laboratory of Nanosystem and Hierarchical Fabrication, CAS Center for Excellence in Nanoscience, National Center for Nanoscience and Technology, Beijing 100190, P. R. China.*

*b. University of Chinese Academy of Sciences, Beijing 100049, P. R. ChinaAddress here.*

*c. MOE Key Laboratory of Weak-Light Nonlinear Photonics TEDA Applied Physics Institute, School of Physics, Nankai University, Tianjin 300457, China*

*d. Division of Physics and Applied Physics, School of Physical and Mathematical Sciences, Nanyang Technological University, Singapore 637371, Singapore.*

*e. Department of Physics, Beihang University, Beijing 100083, China*

*† These authors contributed equally*

*E-mail: [liuq@nanoctr.cn](mailto:liuq@nanoctr.cn) (Qian Liu)*

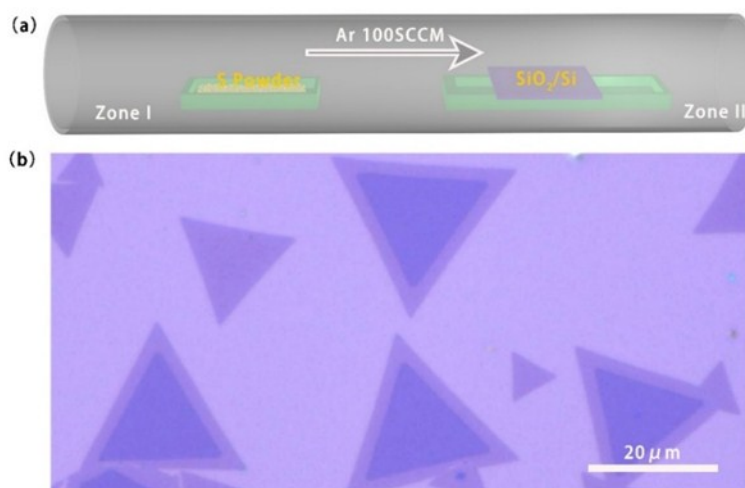

**Fig. S1** Monolayer and bilayer MoS<sub>2</sub> directly synthesis on SiO<sub>2</sub>/Si substrate without functionated pretreatment. (a) Schematic of the CVD setup for synthesis the monolayer and bilayer MoS<sub>2</sub>. (b) Optical microscope image of MoS<sub>2</sub> grown on SiO<sub>2</sub>/Si substrate by CVD.

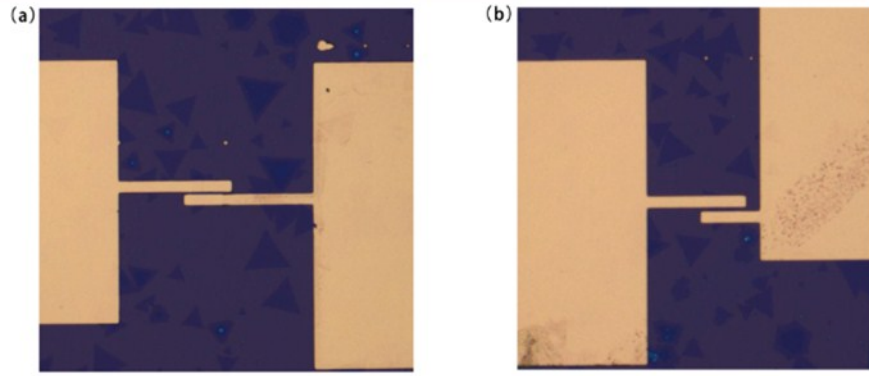

Fig. S2 Optical images of optoelectronic memory based on the monolayer and bilayer MoS2

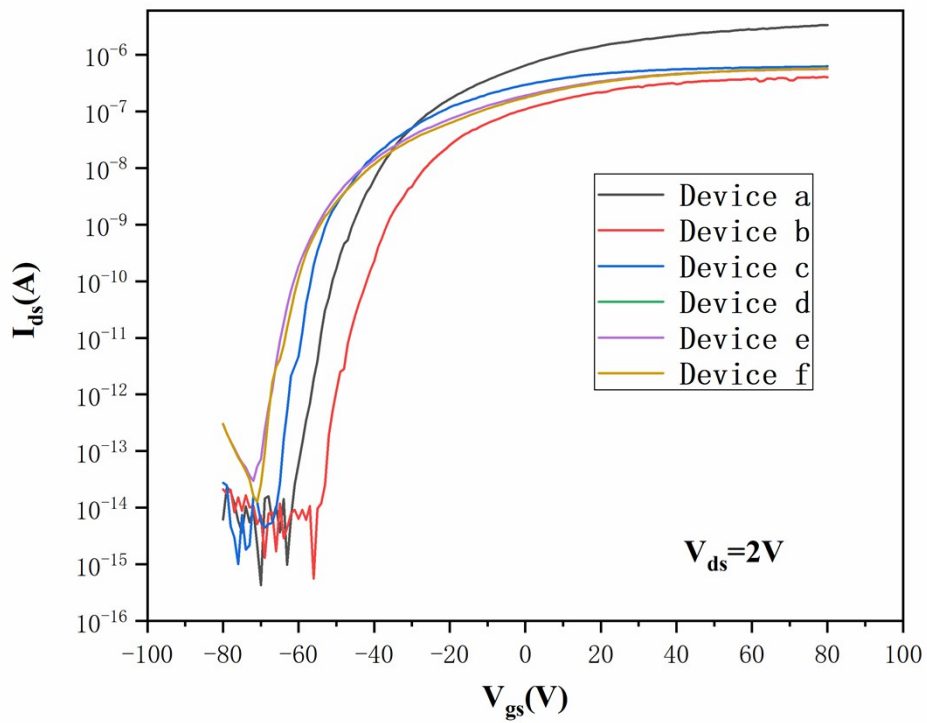

Fig. S3 Transfer characteristics of the Different devices at  $V_{ds} = 2$  V.

Table S1 Ra and Rq of the monolayer and bilayer MoS2.

| Roughness      | Ra (nm) | Rq (nm) |
|----------------|---------|---------|
| Monolayer MoS2 | 0.131   | 0.173   |
| Bilayer MoS2   | 0.0849  | 0.107   |

**Table S2 Comparison between existing MoS<sub>2</sub> memory and our bilayer MoS<sub>2</sub> memory..**

| <b>MoS<sub>2</sub> memory structure</b>                                                                | <b>on/off ratio</b> | <b>Retention time</b> | <b>Cyclic</b> | <b>Reference</b>                                            |
|--------------------------------------------------------------------------------------------------------|---------------------|-----------------------|---------------|-------------------------------------------------------------|
| Planar Au/Ti/MoS <sub>2</sub> /Ti/Au                                                                   | 8×10 <sup>4</sup>   | 2.2×10 <sup>4</sup> s | >10           | Our work                                                    |
| Planar Au/Cr/MoS <sub>2</sub> /Cr/Au/<br>substrate<br>Si/Au/Al <sub>2</sub> O <sub>3</sub> /AuNPs/cPVP | ~10 <sup>5</sup>    | 10 <sup>3</sup> s     | >200          | <i>ACS Appl. Mater. Interfaces</i> 2017, 9, 31, 26357-26362 |
| Planar Au/MoS <sub>2</sub> /Au                                                                         | 4700                | 10 <sup>4</sup> s     | ————          | <i>Nature communications</i> , 2017, 8, 14734               |
